# Supplementary material for: Cost-Effective Modular Biosensor for SARS-CoV-2 and Influenza A Detection
Source: MDPI journal article supplement (doi:10.3390/bios13090874), 2023-09-07
Supplement: s1 [file s1]

# Cost-Effective Modular Biosensor for SARS-CoV-2 and Influenza A Detection

Andrew Murray, Julio Ojeda, Omar El Merhebi, Percy Calvo-Marzal, Yulia Gerasimova and Karin Chumbimuni-Torres

## Supporting Information

**Table S1.** Sequences of oligonucleotide used in the study.

| Strand                   | Sequence (5'-3') <sup>1</sup>                                                                                                                |
|--------------------------|----------------------------------------------------------------------------------------------------------------------------------------------|
| USL                      | /ThiolMC6-D/TTTTTTTTTTCGCGTTAAACATACAATAGATCGCG                                                                                              |
| UMeB                     | MeBIN/CGGTACATTGTTGAG <sup>2</sup>                                                                                                           |
| SARS-S<br>m-strand       | TTGAGCAATC/iSp9/ TATGTTAACTTCTCAACAATGTACCG <sup>3</sup>                                                                                     |
| SARS- S<br>f-strand      | GATCTATTG/iSp9/ ATTCATCTGTGAGCAAAGGTG <sup>3</sup>                                                                                           |
| SARS- S                  | GTTTTGCCACCTTTGCTCACAGATGAAATGATTGCTCAATACACTTCTGCACTGTTAGCG                                                                                 |
| SARS_FP                  | AATTCTAATACGACTCACTATAGGGAGAAGGGCCTTGGTGATATTGCTGCTAGA                                                                                       |
| SARS-RP                  | CGCTAACAGTGCAGAAAGTGA                                                                                                                        |
| SARS-S NASBA<br>Amplicon | GGGAGAAGGGCCUUGGUGAUUUGCUGCUAGAGACCUCUUUGUGCACAAAAGUUU-<br>AAC-<br>GGCCUUACUGUUUUGCCACCUUUGCUCACAGAUGAAAUGAUUGCUCAAUACACUUCUG<br>CACUGUUAGCG |
| SARS- N<br>m-strand      | GCTGCCTGGAGTTGA/Isp9/TATGTTAACTTCTCAACAATGTACCG <sup>3</sup>                                                                                 |
| SARS- N<br>f-strand      | GATCTATTG/Isp9/ATTTCTTGAAGTGTGCGACTA <sup>3</sup>                                                                                            |
| SARS-N target            | TAGTCGCAACAGTTCAAGAAATTCAACTCCAGGCAGCAGTAGGGGAAGTCTCCTGCTAG                                                                                  |
| InfA-M<br>m-strand       | T CTC GGC TTT /iSp9/ TATGTTAACTTCTCAACAATGTACCG <sup>3</sup>                                                                                 |
| InfA-M<br>f-strand       | GATCTATTG/iSp9/ GAGGGGGCCTGATGG AAC <sup>3</sup>                                                                                             |
| InfA -M target           | TATGTTCTCTCTATCGTTCCATCAGGCCCCCTCAAAGCCGAGATCGCGCAGAGACTTGAA                                                                                 |

<sup>1</sup> Fragments of strands complementary to another are colored the same and/or underlined. <sup>2</sup>MeB: methylene blue. <sup>3</sup>iSp9: triethylene glycol spacer.

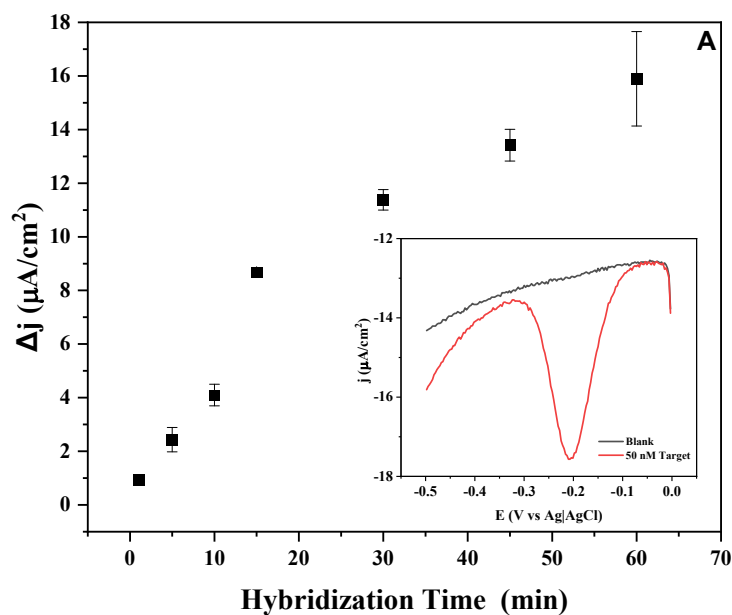

**Figure S1.** Response of the SARS-CoV-2 gene S sensor for a varied hybridization time (1, 5, 10, 15, 30, 45 and 60 minutes) using the SARS-S target (50 nM) on GDEs. Inset: SWV response before (black) and after (red) addition of the target with 10-min hybridization time.

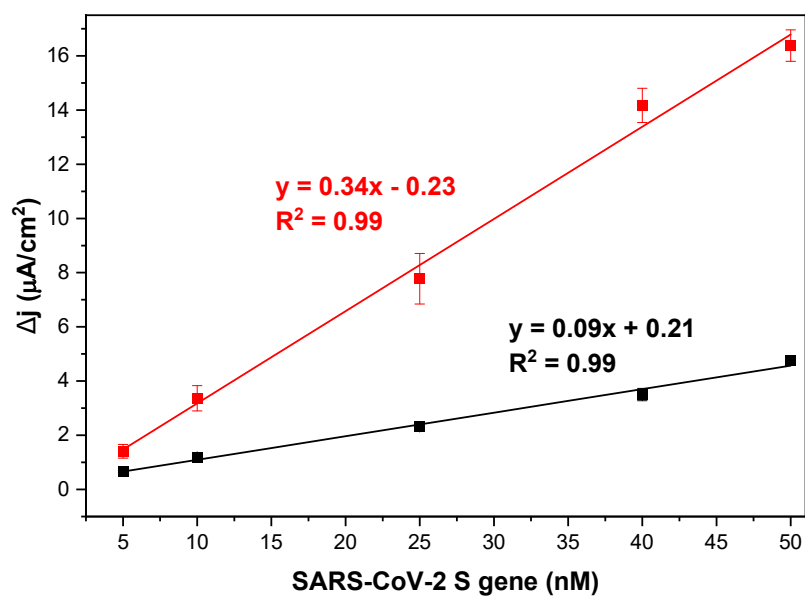

**Figure S2.** Calibration curves obtained for SARS-S-specific biosensor on SPGEs using varied concentrations (5, 10, 25, 40, and 50 nM) of the SARS-S target with 10 min (black dots) and 30 min (red dots) hybridization time.

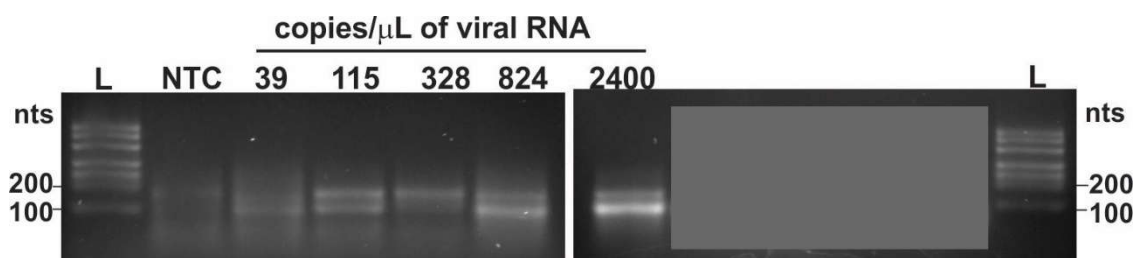

**Figure S3.** Analysis of NASBA amplicons in 2% agarose gel. Samples containing ~2400, 824, 328, 115 or 39 copies/ $\mu$ L of SARS-Cov-2 RNA were subjected to NASBA reaction for 90 min. L: ssRNA ladder (the bands corresponding to 100- and 200-nt RNA fragments are labeled); NTC: NASBA no-template control. A grey box in the right gel image masks other samples that were analyzed in the same gel but are irrelevant for the reported work.
